# Supplementary material
Source: Elsevier journal article supplement (https://www.sciencedirect.com/science/article/pii/S0212656714004016)
Supplement: mmc2 [file S0212656714004016:mmc2.pdf]

## ANEXO 2.

TEST DE FINDRISC. Tomado de la página web de revista Diabetes de la Sociedad Española de Diabetes. Disponible en: [www.revistadiabetes.org/test.asp](http://www.revistadiabetes.org/test.asp)

Seleccione una opción de cada una de las preguntas y pulse el botón "Calcular riesgo" para calcular la suma de los puntos. Se le indicará el resultado según la escala de riesgo.

### 1. Edad

- ☐ Menos de 45 años
- ☐ Entre 45-54 años
- ☐ Entre 55-64 años
- ☐ Más de 64 años

### 2. Índice de masa corporal (IMC)

- ☐ Menos de 25 Kg/m<sup>2</sup>
- ☐ Entre 25-30 Kg/m<sup>2</sup>
- ☐ Más de 30 Kg/m<sup>2</sup>

### 3. Perímetro de la cintura medido a la altura del ombligo

#### VARONES

- ☐ Menos de 90 cm
- ☐ Entre 90-102 cm
- ☐ Más de 102 cm

#### MUJERES

- ☐ Menos de 80 cm
- ☐ Entre 80-88 cm
- ☐ Más de 88 cm

### 4. ¿Normalmente practica usted 30 minutos cada día de actividad física en el trabajo y/o en su tiempo libre (incluida la actividad diaria normal)?

- ☐ SÍ
- ☐ NO

### 5. ¿Con cuánta frecuencia come usted vegetales o frutas?

- ☐ Todos los días
- ☐ No todos los días

### 6. ¿Ha tomado usted medicación para la hipertensión con regularidad?

- ☐ NO
- ☐ SÍ

### 7. ¿Le han encontrado alguna vez niveles altos de glucosa en sangre, por ejemplo, en un examen médico, durante una enfermedad, durante el embarazo?

- ☐ NO
- ☐ SÍ

**8. ¿A algún miembro de su familia le han diagnosticado diabetes (tipo 1 o tipo 2)?**

- ☐ NO
- ☐ SÍ: Abuelos, tíos o primos-hermanos (pero no: padres, hermanos o hijos)
- ☐ SÍ: Padres, hermanos o hijos

**Escala de riesgo total**

puntos

**Si tiene entre 50 y 69 años y su puntuación en este test es MAYOR DE 14** Usted debe ponerse en contacto con el Centro de Salud que le corresponda para que le hagan una valoración médica de su riesgo de diabetes, y le den información más detallada sobre cómo evitarla o retrasarla. Igualmente corregir
